# Supplementary material for: Multiple Indicators of Extreme Changes in Snow-Dominated Streamflow Regimes, Yakima River Basin Region, USA
Source: MDPI journal article supplement (doi:10.3390/w13192608), 2021-09-22
Supplement: s1 [file s1]

# Multiple indicators of extreme changes in snow-dominated streamflow regimes, Yakima River basin region, USA

Anna M. Wagner <sup>1\*</sup>, Katrina E. Bennett <sup>2</sup>, Glen E. Liston <sup>3</sup>, Chris A. Hiemstra <sup>4</sup>, and Dan Cooley <sup>5</sup>

<sup>1</sup> US Army Cold Regions Research and Engineering Laboratory, Fort Wainwright, AK, 99703, USA

<sup>2</sup> Los Alamos National Laboratory, Earth and Environmental Sciences, Los Alamos, NM, 87545, USA; kbennett@lanl.gov

<sup>3</sup> Cooperative Institute for Research in the Atmosphere, Colorado State University, Fort Collins, CO, 80523, USA; Glen.Liston@colostate.edu

<sup>4</sup> USDA Forest Service, Geospatial Management Office, Salt Lake City, UT, 84138, USA; Christopher.Hiemstra@usda.gov

<sup>5</sup> Department of Statistics, Colorado State University, Fort Collins, CO, 80523, USA; cooleyd@rams.colostate.edu

\* Correspondence: Anna.M.Wagner@erdc.dren.mil

**Table S1.** Characteristics for the 22 automated SNOTEL stations from Natural Resources Conservation Service, including SNOTEL site name and number, latitude, longitude, elevation, and basin location.

| Site Name              | Latitude | Longitude | Elevation (m) | Location (Basin) |
|------------------------|----------|-----------|---------------|------------------|
| Fish Lake (478)        | 47.54    | -121.09   | 1,045         | Yakima           |
| Pope Ridge (699)       | 47.99    | -120.57   | 1,094         | Upper Columbia   |
| Stampede Pass (788)    | 47.27    | -121.34   | 1,173         | Yakima           |
| Stevens Pass (791)     | 47.75    | -121.09   | 1,204         | Upper Columbia   |
| Olallie Meadows (672)  | 47.37    | -121.44   | 1,228         | Yakima           |
| Blewett Pass (352)     | 47.35    | -120.68   | 1,292         | Upper Columbia   |
| Thunder Basin (817)    | 48.53    | -120.99   | 1,317         | Puget Sound      |
| Upper Wheeler (841)    | 47.29    | -120.37   | 1,320         | Upper Columbia   |
| Sasse Ridge (734)      | 47.38    | -121.06   | 1,323         | Yakima           |
| White Pass E.S. (863)  | 46.64    | -121.38   | 1,353         | Yakima           |
| Park Creek Ridge (681) | 48.44    | -120.92   | 1,402         | Upper Columbia   |
| Bumping Ridge (375)    | 46.81    | -121.33   | 1,405         | Yakima           |
| Rainy Pass (711)       | 48.52    | -120.74   | 1,490         | Puget Sound      |
| Lost Horse (599)       | 46.36    | -121.08   | 1,561         | Yakima           |
| Grouse Camp (507)      | 47.28    | -120.49   | 1,643         | Yakima           |
| Morse Lake (642)       | 46.91    | -121.48   | 1,649         | Yakima           |
| Trough (832)           | 47.23    | -120.29   | 1,670         | Upper Columbia   |
| Corral Pass (418)      | 47.02    | -121.46   | 1,768         | Puget Sound      |
| Pigtail Peak (692)     | 46.62    | -121.39   | 1,768         | Yakima           |
| Green Lake (502)       | 46.55    | -121.17   | 1,804         | Yakima           |
| Lyman Lake (606)       | 48.20    | -120.92   | 1,823         | Upper Columbia   |
| Harts Pass (515)       | 48.72    | -120.66   | 1,978         | Upper Columbia   |

**Table S2.** Characteristics for the eight Washington state streamflow gages and sites analyzed in this study. Site name and abbreviated description, USGS ID, latitude, longitude, basin area, elevation of USGS gage, and basin location.

| Site Name (Short Name)                              | USGS ID  | Latitude | Longitude | Area (km <sup>2</sup> ) | Elevation (m) | Location     |
|-----------------------------------------------------|----------|----------|-----------|-------------------------|---------------|--------------|
| American River Near Nile (AMRW)                     | 12488500 | 46.98    | -121.17   | 79                      | 823           | Yakima River |
| Yakima River at Cle Elum (YUMW)                     | 12479500 | 47.19    | -120.95   | 502                     | 580           | Yakima River |
| Yakima River at Umtanum (UMTW)                      | 12484500 | 46.86    | -120.48   | 1,594                   | 396           | Yakima River |
| Tieton River at Canal Headworks near Naches (TIECH) | 12492500 | 46.67    | -121.00   | 239                     | 695           | Yakima River |
| Yakima River near Parker (PARW)                     | 12505000 | 46.50    | -120.44   | 188                     | 270           | Yakima River |

| Site Name (Short Name)             | USGS ID  | Latitude | Longitude | Area (km <sup>2</sup> ) | Elevation (m) | Location        |
|------------------------------------|----------|----------|-----------|-------------------------|---------------|-----------------|
| Wenatchee River near Plain (WENPL) | 12457000 | 47.76    | -120.67   | 591                     | 550           | Wenatchee River |
| Stehekin River at Stehekin (STEHE) | 12451000 | 48.33    | -120.69   | 321                     | 335           | Stehekin River  |
| Methow River at Twisp (METTW)      | 12449500 | 48.37    | -120.12   | 1,301                   | 482           | Methow River    |

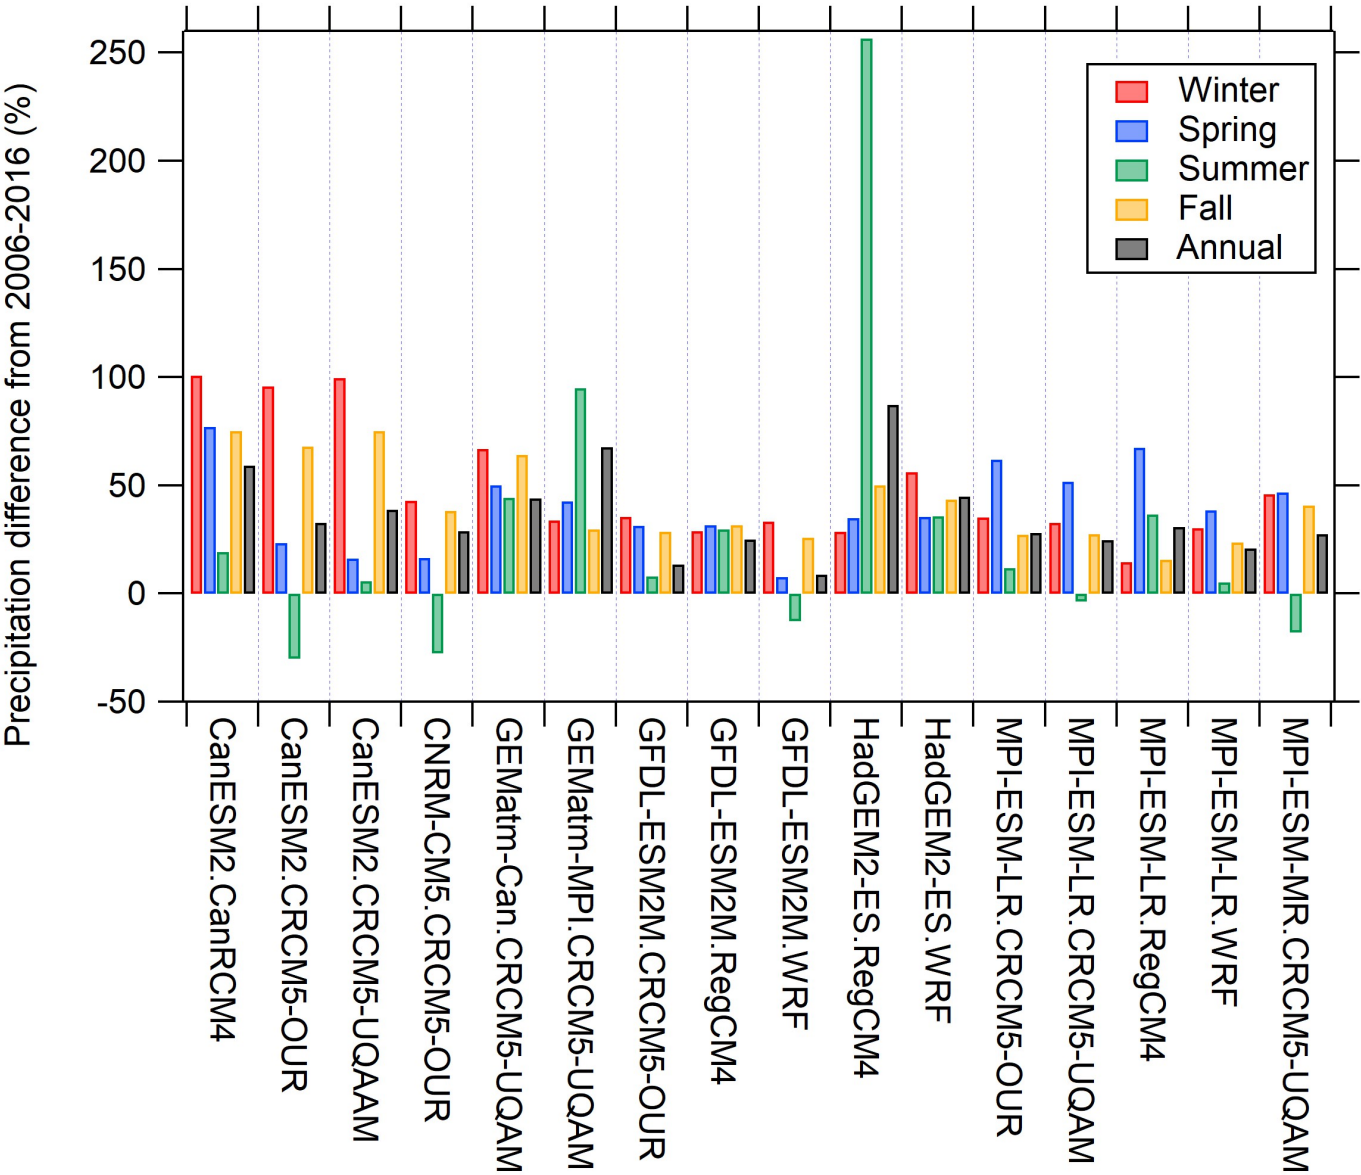

**Figure S1.** Precipitation comparison between 2006-2016 (current/historical) and 2070-2099 (future) for the CORDEX RCP 8.5 models that support the selection of our two future models. The CanESM2.CanRCM4 model shows the wettest winter and spring for the current climate compared to future projections and the GFDL-ESM2M.WRF model is the driest (winter and spring) in comparison to the future climate.

## Trends in weekly, seasonal, and annual streamflow

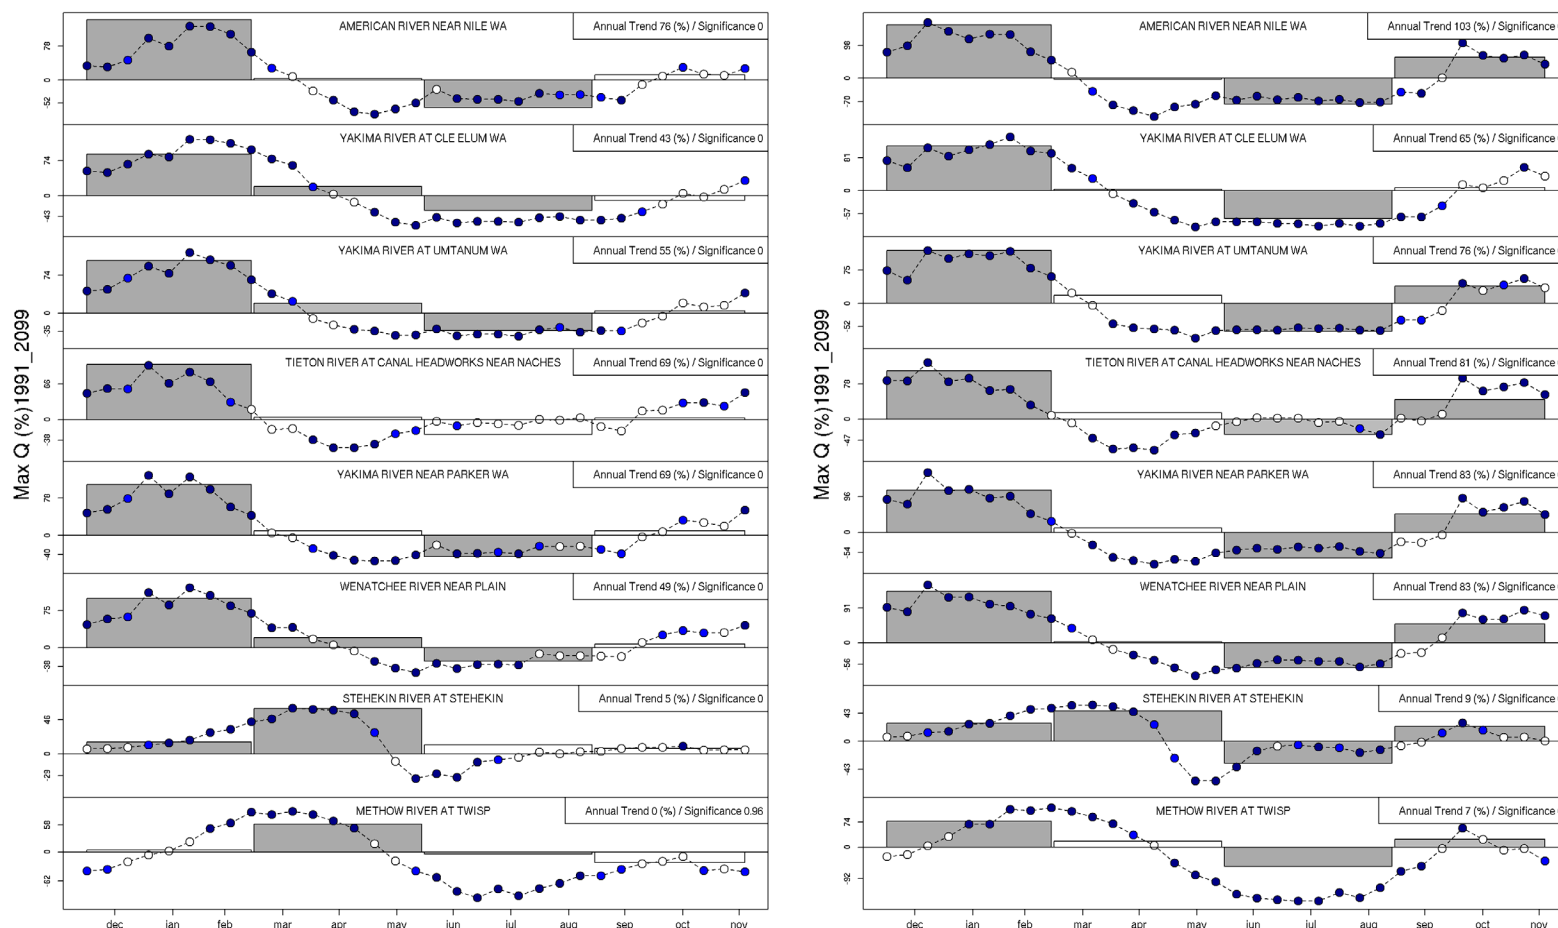

**Figure S2.** Left, GFDL-ESM2M for 1991-2099 maximum streamflow. Right, CanESM2 for 1991-2099 maximum streamflow. Darker shades of blue represent p-values  $\leq 0.01$ , while lighter shades of blue represent p-values  $\leq 0.05$  for statistical significance.

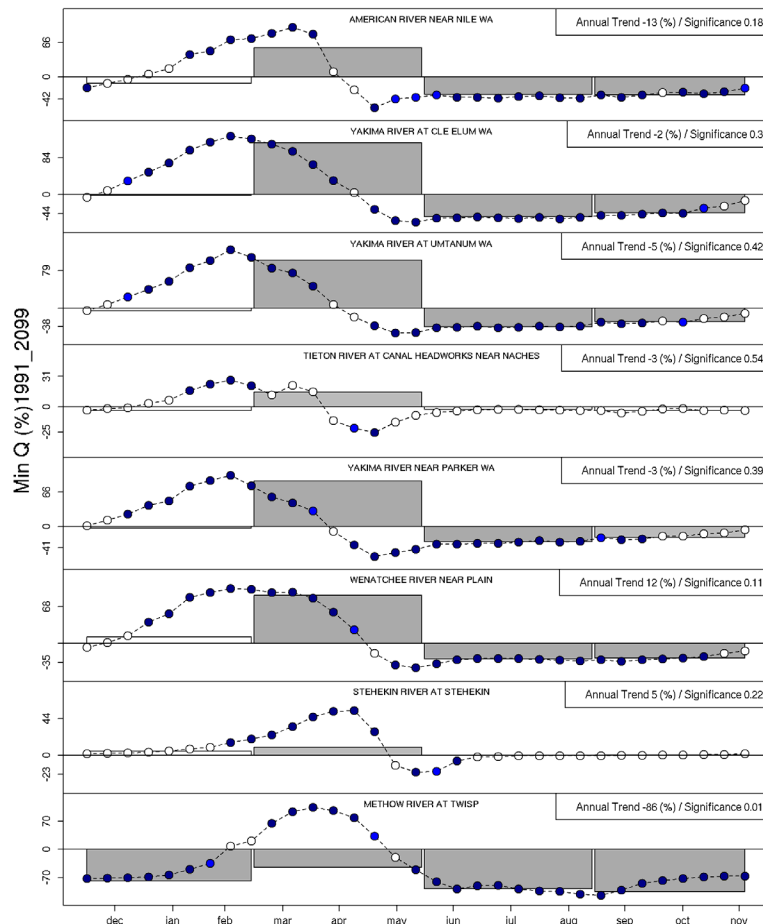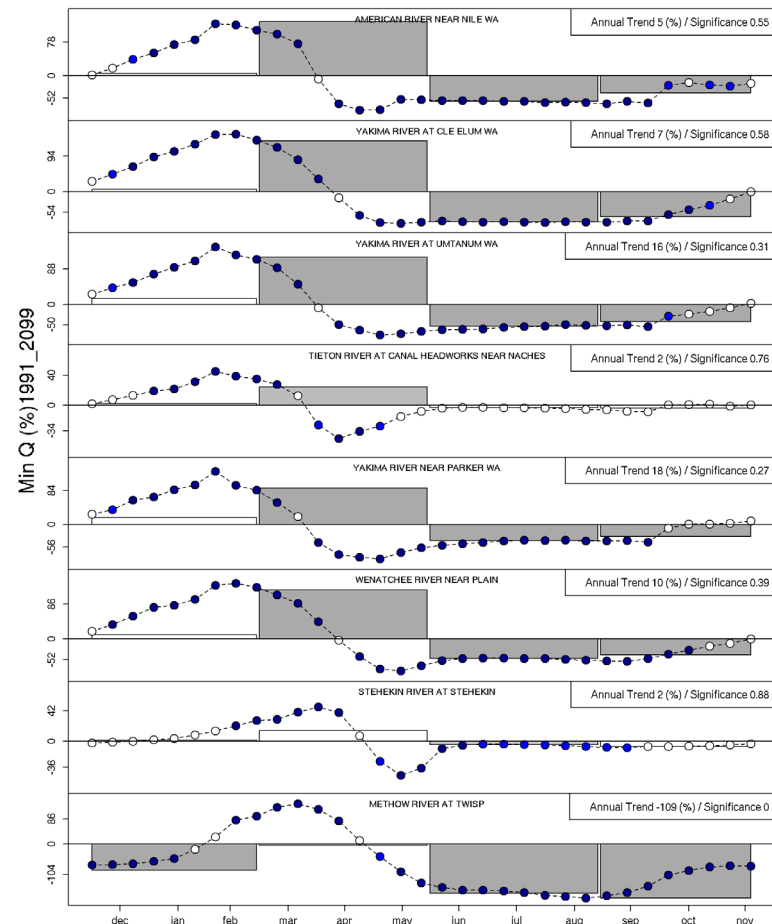

**Figure S3.** Left, GFDL-ESM2M for 1991-2099 minimum streamflow trends. Right, CanESM2 for 1991-2099 minimum streamflow trends. Darker shades of blue represent p-values  $\leq 0.01$ , while lighter shades of blue represent p-values  $\leq 0.05$  for statistical significance.

**Table S3.** Seasonal and annual trends for minimum and maximum streamflow (m3/s) for 1991-2099 for GFDL-ES2M. Trends are values occurring over the 109 year time period. Bold values indicate significant trends (p-value <= 0.05).

| <b>GFDL-ESM2M Streamflow Maximum</b>                | DJF          | MAM          | JJA           | SON           | YR            |
|-----------------------------------------------------|--------------|--------------|---------------|---------------|---------------|
| American River Near Nile (AMRW)                     | <b>138.8</b> | 3.8          | <b>-63.8</b>  | 12.5          | <b>75.8</b>   |
| Yakima River at Cle Elum (YUMW)                     | <b>86.7</b>  | <b>19.3</b>  | <b>-31.0</b>  | -10.1         | <b>43.3</b>   |
| Yakima River at Umtanum (UMTW)                      | <b>102.8</b> | <b>19.0</b>  | <b>-33.5</b>  | 4.7           | <b>55.4</b>   |
| Tieton River at Canal Headworks near Naches (TIECH) | <b>102.0</b> | 4.5          | -27.9         | 2.7           | <b>68.6</b>   |
| Yakima River near Parker (PARW)                     | <b>106.4</b> | 9.2          | <b>-44.9</b>  | 9.5           | <b>68.8</b>   |
| Wenatchee River near Plain (WENPL)                  | <b>99.0</b>  | <b>20.0</b>  | <b>-27.6</b>  | 6.7           | <b>49.4</b>   |
| Stehekin River at Stehekin (STEHE)                  | <b>15.9</b>  | <b>60.9</b>  | 12.0          | 7.2           | <b>4.7</b>    |
| Methow River at Twisp (METTW)                       | 4.4          | <b>59.5</b>  | -4.8          | -22.6         | 0.3           |
| <b>GFDL-ESM2M Streamflow Minimum</b>                |              |              |               |               |               |
| American River Near Nile (AMRW)                     | -12.2        | <b>56.7</b>  | <b>-33.6</b>  | <b>-34.0</b>  | -12.6         |
| Yakima River at Cle Elum (YUMW)                     | -2.2         | <b>118.1</b> | <b>-51.0</b>  | <b>-42.5</b>  | -2.3          |
| Yakima River at Umtanum (UMTW)                      | -5.3         | <b>100.8</b> | <b>-39.3</b>  | <b>-28.4</b>  | -5.5          |
| Tieton River at Canal Headworks near Naches (TIECH) | -3.4         | <b>15.0</b>  | -2.3          | -3.5          | -3.4          |
| Yakima River near Parker (PARW)                     | -3.2         | <b>87.7</b>  | <b>-29.4</b>  | <b>-21.0</b>  | -3.2          |
| Wenatchee River near Plain (WENPL)                  | 11.7         | <b>88.5</b>  | <b>-28.5</b>  | <b>-26.9</b>  | 12.0          |
| Stehekin River at Stehekin (STEHE)                  | 4.5          | <b>9.4</b>   | -0.3          | 0.5           | 4.6           |
| Methow River at Twisp (METTW)                       | <b>-78.2</b> | <b>-44.6</b> | <b>-98.1</b>  | <b>-105.4</b> | <b>-85.6</b>  |
| <b>CanESM2 Streamflow Maximum</b>                   |              |              |               |               |               |
| American River Near Nile (AMRW)                     | <b>159.1</b> | -3.7         | <b>-78.0</b>  | <b>62.3</b>   | <b>103.0</b>  |
| Yakima River at Cle Elum (YUMW)                     | <b>109.8</b> | 3.2          | <b>-69.0</b>  | 7.5           | <b>65.2</b>   |
| Yakima River at Umtanum (UMTW)                      | <b>119.2</b> | 18.3         | <b>-63.0</b>  | <b>39.3</b>   | <b>76.4</b>   |
| Tieton River at Canal Headworks near Naches (TIECH) | <b>107.9</b> | 13.8         | <b>-34.1</b>  | <b>43.4</b>   | <b>80.7</b>   |
| Yakima River near Parker (PARW)                     | <b>113.1</b> | 11.7         | <b>-68.5</b>  | <b>49.6</b>   | <b>82.9</b>   |
| Wenatchee River near Plain (WENPL)                  | <b>134.8</b> | 3.1          | <b>-64.8</b>  | <b>49.0</b>   | <b>82.7</b>   |
| Stehekin River at Stehekin (STEHE)                  | <b>27.9</b>  | <b>46.9</b>  | <b>-33.9</b>  | <b>22.7</b>   | <b>9.3</b>    |
| Methow River at Twisp (METTW)                       | <b>76.8</b>  | 17.4         | <b>-56.5</b>  | <b>23.6</b>   | <b>6.7</b>    |
| <b>CanESM2 Streamflow Minimum</b>                   |              |              |               |               |               |
| American River Near Nile (AMRW)                     | 5.4          | <b>126.1</b> | <b>-59.9</b>  | <b>-40.0</b>  | 5.5           |
| Yakima River at Cle Elum (YUMW)                     | 6.0          | <b>133.7</b> | <b>-79.2</b>  | <b>-66.8</b>  | 6.7           |
| Yakima River at Umtanum (UMTW)                      | 14.7         | <b>116.9</b> | <b>-53.2</b>  | <b>-42.6</b>  | 15.7          |
| Tieton River at Canal Headworks near Naches (TIECH) | 2.1          | <b>24.5</b>  | -3.5          | -3.7          | 2.1           |
| Yakima River near Parker (PARW)                     | 16.9         | <b>89.8</b>  | <b>-39.8</b>  | <b>-29.6</b>  | 17.7          |
| Wenatchee River near Plain (WENPL)                  | 9.3          | <b>119.9</b> | <b>-48.8</b>  | <b>-39.7</b>  | 9.6           |
| Stehekin River at Stehekin (STEHE)                  | 1.8          | 14.9         | <b>-4.8</b>   | -7.0          | 1.8           |
| Methow River at Twisp (METTW)                       | <b>-88.5</b> | -4.7         | <b>-167.3</b> | <b>-184.4</b> | <b>-109.3</b> |

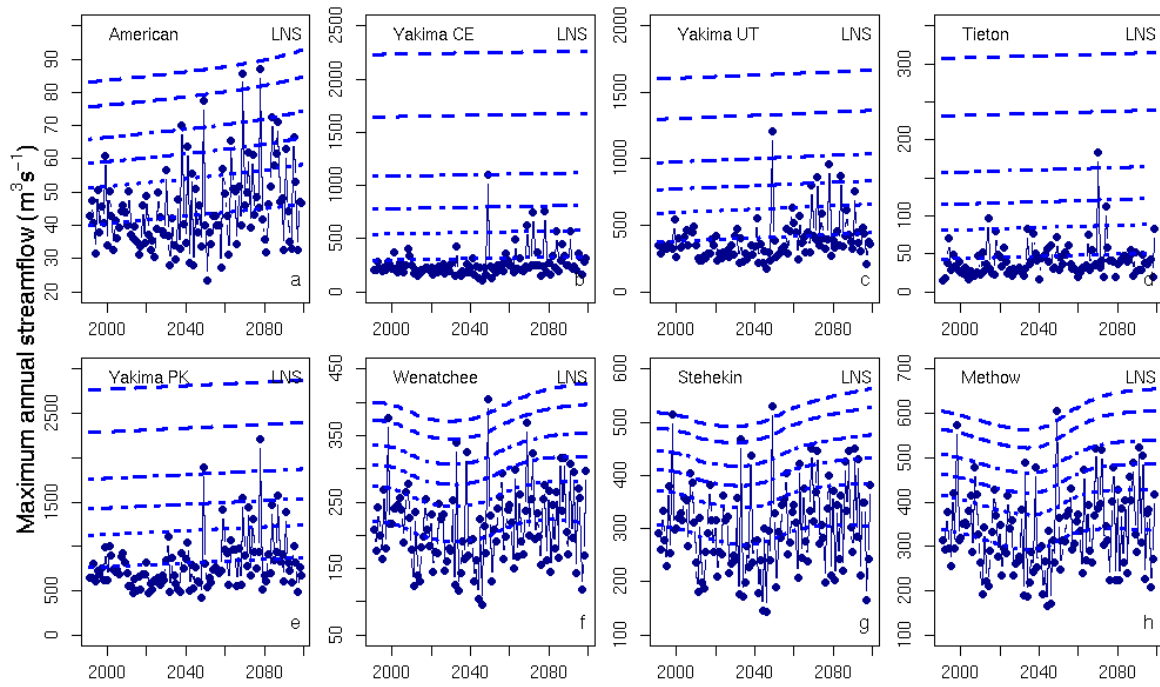

**Figure S4.** GEV results for eight stations for the maximum annual streamflow from 1991-2099 for the GFDL- ESM2M model.

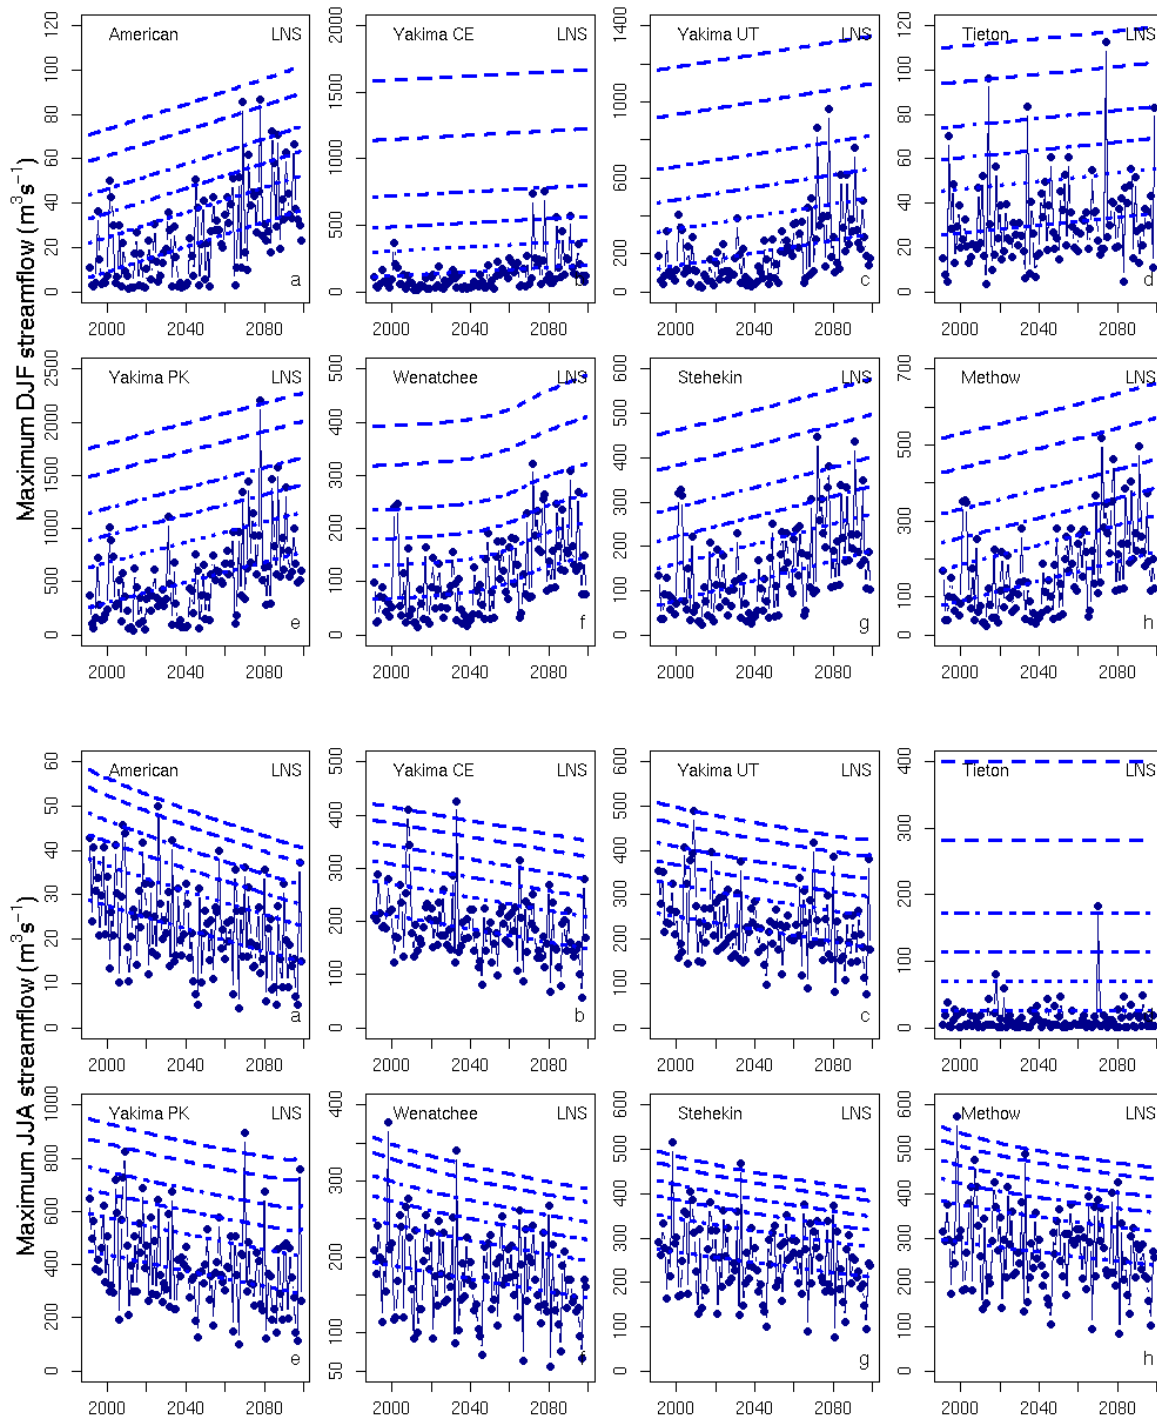

**Figure S5.** GEV results for eight stations for the maximum DJF (top) and JJA (bottom) streamflow from 1991-2099 for the GFDL-ESM2M model.
